# Supplementary material for: Theoretical study on the effective dehydrochlorination of 1,2-dichloroethane catalyzed by tetraalkylphosphonium chlorides: electrostatically controlled reactivity
Source: Royal Society of Chemistry journal article supplement (doi:10.1039/c8nj00354h), 2018-01-01
Supplement: c8nj00354h1.pdf [file c8nj00354h1.pdf]

***Electronic Supplementary Information***

*For*

Theoretical study on the effective dehydrochlorination of 1,2-dichloroethane catalyzed  
by tetraalkylphosphonium chlorides: electrostatically controlled reactivity

Xueli Mu, Yaru Jing, Chengbu Liu,\* and Dongju Zhang\*

Institute of Theoretical Chemistry, School of Chemistry and Chemical Engineering,  
Shandong University, Jinan 250100, China

Email: zhangdj@sdu.edu.cn

Email: cbliu@sdu.edu.cn

Abbreviations used in the manuscript:

DFT: density functional theory

IL: ionic liquid

$C_{mmmm(n)}P^+Cl^-$ : symmetrical and asymmetrical tetraalkylphosphonium chlorides,  $m=1-4$ ,  $n=1, 3, 14$

$C_{mmmm}P^+Cl^-$ : symmetrical tetraalkylphosphonium chlorides,  $m=1-4$

$C_{444,n}P^+Cl^-$ : asymmetrical tetraalkylphosphonium chlorides,  $n=1, 3, 14$

$C_{1111}P^+Cl^-$ : tetramethylphosphonium chloride

$C_{2222}P^+Cl^-$ : tetraethylphosphonium chloride

$C_{3333}P^+Cl^-$ : tetrapropylphosphonium chloride

$C_{4444}P^+Cl^-$ : tetrabutylphosphonium chloride

$C_{444,1}P^+Cl^-$ : tributyltetramethylphosphonium chloride

$C_{444,3}P^+Cl^-$ : tributyltetrapropyl phosphonium chloride

$C_{444,14}P^+Cl^-$ : tributyltetradecylphosphonium chloride

$Bmin^+Cl^-$ : 1-butyl-3-methyl imidazolium chloride

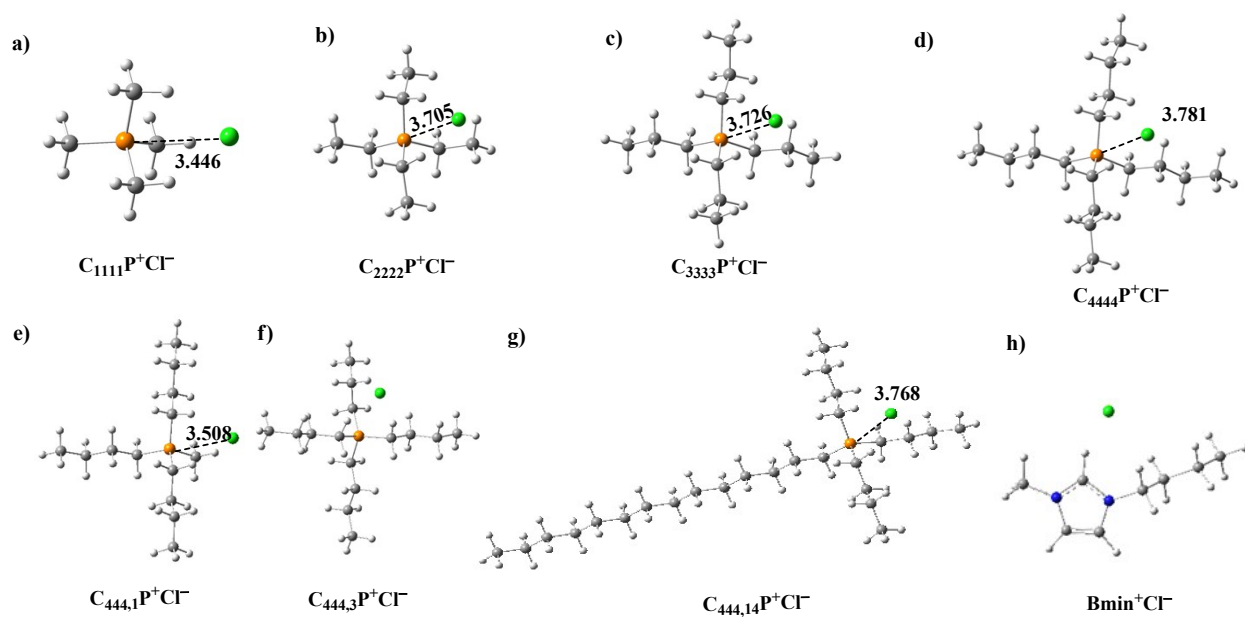

**Fig. S1** Optimized structures of symmetrical tetraalkylphosphonium chlorides (a-d), asymmetrical tetraalkylphosphonium chlorides (e-g), and  $Bmin^+Cl^-$  ionic pair (h).

Cartesian coordinates of all structures optimized in this work:

$C_{1111}P^+Cl^-$ :

|    |             |             |             |
|----|-------------|-------------|-------------|
| P  | 0.84433200  | 0.00056700  | -0.00077900 |
| C  | 2.67367400  | -0.00181300 | 0.00045800  |
| H  | 3.05005700  | 0.76971400  | 0.67732900  |
| H  | 3.04644500  | -0.97470200 | 0.33151900  |
| H  | 3.05010200  | 0.19696100  | -1.00647000 |
| C  | 0.27567500  | -1.29126800 | -1.13570600 |
| H  | 0.63490300  | -2.26711700 | -0.79742000 |
| H  | -0.82427800 | -1.24380500 | -1.10376200 |
| H  | 0.64877400  | -1.09202900 | -2.14404100 |
| C  | 0.27780800  | 1.63047700  | -0.55028700 |
| H  | -0.82215500 | 1.57899800  | -0.53353800 |
| H  | 0.64430700  | 2.40056700  | 0.13396600  |
| H  | 0.64548400  | 1.83159400  | -1.56029900 |
| C  | 0.27659000  | -0.33757800 | 1.68604100  |
| H  | 0.64659400  | 0.43544400  | 2.36523600  |
| H  | -0.82337000 | -0.32347600 | 1.63271600  |
| H  | 0.64071400  | -1.31630900 | 2.00996100  |
| Cl | -2.60147300 | -0.00019200 | 0.00020300  |

$C_{2222}P^+Cl^-$ :

|   |             |             |             |
|---|-------------|-------------|-------------|
| P | -0.59288100 | -0.00001500 | 0.15392600  |
| C | 0.01289500  | -0.00157300 | 1.88919500  |
| C | 1.53192300  | -0.00410200 | 2.10942000  |
| H | -0.45275300 | -0.87757100 | 2.35736900  |
| H | -0.44991100 | 0.87557700  | 2.35801300  |
| H | 1.72809900  | -0.00443100 | 3.18658000  |
| H | 2.01144300  | -0.87135500 | 1.65414000  |
| H | 2.01445100  | 0.86130300  | 1.65383000  |
| C | -0.06289400 | -1.48539100 | -0.76200800 |
| C | -0.28666900 | -2.81610900 | -0.03352300 |
| H | 1.00880300  | -1.29250500 | -0.97324700 |
| H | -0.59194500 | -1.46161600 | -1.72209800 |
| H | 0.05010100  | -3.63363600 | -0.67643600 |
| H | 0.29892700  | -2.87058200 | 0.88841500  |
| H | -1.33775900 | -3.00320600 | 0.21336600  |
| C | -2.43047700 | -0.00009300 | 0.33146700  |
| C | -3.21346100 | 0.00123200  | -0.98830800 |
| H | -2.69145800 | 0.87706200  | 0.93439100  |
| H | -2.69154700 | -0.87840300 | 0.93266400  |
| H | -4.28756100 | 0.00101600  | -0.78274200 |
| H | -2.99324800 | 0.88681400  | -1.59089400 |

|    |             |             |             |
|----|-------------|-------------|-------------|
| H  | -2.99322600 | -0.88313300 | -1.59267200 |
| C  | -0.06295400 | 1.48683500  | -0.75965700 |
| C  | -0.28588400 | 2.81636400  | -0.02874100 |
| H  | -0.59261300 | 1.46487400  | -1.71945600 |
| H  | 1.00860100  | 1.29409900  | -0.97178700 |
| H  | 0.05075900  | 3.63487900  | -0.67046300 |
| H  | -1.33675400 | 3.00340800  | 0.21913800  |
| H  | 0.30034900  | 2.86906800  | 0.89289600  |
| Cl | 2.91915200  | 0.00150500  | -1.02629200 |

$C_{3333}P^+Cl^-$ :

|   |             |             |             |
|---|-------------|-------------|-------------|
| P | 0.40955100  | -0.00112900 | 0.20322900  |
| C | 2.14213700  | -0.00432600 | 0.83798200  |
| C | 3.24526100  | -0.00101000 | -0.23357500 |
| H | 2.24351100  | -0.88511800 | 1.48378600  |
| H | 2.24451300  | 0.87156900  | 1.49026700  |
| C | 4.64663200  | -0.00613200 | 0.38700000  |
| H | 3.13243800  | -0.87572200 | -0.88446200 |
| H | 3.13511000  | 0.88020100  | -0.87606000 |
| H | 5.41630000  | -0.00356800 | -0.39028300 |
| H | 4.80553000  | 0.87537600  | 1.01734900  |
| H | 4.80282600  | -0.89414000 | 1.00884300  |
| C | -0.61382000 | -0.00039000 | 1.72754500  |
| C | -2.14446500 | -0.00532900 | 1.56957300  |
| H | -0.28784400 | 0.87928400  | 2.29810900  |
| H | -0.28258700 | -0.87473700 | 2.30325600  |
| C | -2.83446900 | 0.00301100  | 2.93684000  |
| H | -2.46502800 | 0.84846500  | 0.96735500  |
| H | -2.46012700 | -0.87098200 | 0.98177500  |
| H | -3.92092400 | -0.00132200 | 2.81238700  |
| H | -2.56430400 | -0.87636900 | 3.53371900  |
| H | -2.56990900 | 0.89334500  | 3.51979900  |
| C | 0.12776600  | 1.48167900  | -0.81956400 |
| C | 0.14715500  | 2.82462000  | -0.07245300 |
| H | -0.85311100 | 1.28562200  | -1.29898200 |
| H | 0.88676600  | 1.46034000  | -1.61192800 |
| C | -0.09104300 | 3.99087600  | -1.03874700 |
| H | -0.63913300 | 2.82826200  | 0.69132600  |
| H | 1.09995900  | 2.97291500  | 0.45434500  |
| H | -0.10252200 | 4.94551400  | -0.50387400 |
| H | 0.69537500  | 4.04164200  | -1.79965900 |
| H | -1.04890400 | 3.87490800  | -1.55400200 |
| C | 0.12308200  | -1.48159800 | -0.82170600 |
| C | 0.14014000  | -2.82568000 | -0.07656300 |

|    |             |             |             |
|----|-------------|-------------|-------------|
| H  | 0.88128800  | -1.46094600 | -1.61484900 |
| H  | -0.85761300 | -1.28218200 | -1.29997200 |
| C  | -0.10466300 | -3.98987500 | -1.04367300 |
| H  | 1.09404000  | -2.97769300 | 0.44716000  |
| H  | -0.64377200 | -2.82783300 | 0.68966800  |
| H  | -0.11742700 | -4.94519200 | -0.51004200 |
| H  | -1.06374300 | -3.87030000 | -1.55583100 |
| H  | 0.67921300  | -4.04206600 | -1.80710600 |
| Cl | -2.71090900 | 0.00779900  | -1.83273500 |

C<sub>4444</sub>P<sup>+</sup>Cl<sup>-</sup>:

|   |             |             |             |
|---|-------------|-------------|-------------|
| P | -0.36077100 | -0.02401700 | -0.21794400 |
| C | -0.15454400 | -1.48740000 | 0.84701300  |
| C | 0.06581300  | -2.82468500 | 0.12430000  |
| H | -1.03905600 | -1.52878900 | 1.49530300  |
| H | 0.70852600  | -1.21414700 | 1.48993800  |
| C | 0.23262600  | -3.97716400 | 1.12630900  |
| H | -0.76705000 | -3.05378700 | -0.55613600 |
| H | 0.96953200  | -2.76388800 | -0.49470500 |
| C | 0.49196900  | -5.32308300 | 0.44447900  |
| H | 1.05829300  | -3.73432500 | 1.80508500  |
| H | -0.66887200 | -4.04572900 | 1.74961100  |
| H | 0.60421900  | -6.12366900 | 1.18189500  |
| H | -0.33220300 | -5.59962400 | -0.22352200 |
| H | 1.40921300  | -5.29386600 | -0.15414600 |
| C | 0.91380800  | 0.04017400  | -1.53737200 |
| C | 2.38344600  | 0.12339200  | -1.09180500 |
| H | 0.64992700  | 0.90099500  | -2.16559700 |
| H | 0.74565900  | -0.85094100 | -2.15598600 |
| C | 3.33035700  | 0.17534900  | -2.29811100 |
| H | 2.53587800  | 0.99493800  | -0.44833000 |
| H | 2.63175300  | -0.72324000 | -0.44494600 |
| C | 4.80117300  | 0.26225800  | -1.87964000 |
| H | 3.17716600  | -0.71428200 | -2.92568000 |
| H | 3.07547200  | 1.03884700  | -2.92924600 |
| H | 5.45987600  | 0.30138300  | -2.75314700 |
| H | 4.98627500  | 1.15612200  | -1.27539800 |
| H | 5.09089200  | -0.60321000 | -1.27528000 |
| C | -1.95693100 | -0.10848300 | -1.13634700 |
| C | -3.22512800 | -0.16384800 | -0.26922300 |
| H | -1.90239100 | -0.98941000 | -1.78774500 |
| H | -1.98743900 | 0.76529300  | -1.79886200 |
| C | -4.50424400 | -0.22520000 | -1.11709600 |

|    |             |             |             |
|----|-------------|-------------|-------------|
| H  | -3.18863500 | -1.03927400 | 0.39092900  |
| H  | -3.26856300 | 0.71586400  | 0.38474400  |
| C  | -5.77756000 | -0.27924400 | -0.26844500 |
| H  | -4.53934300 | 0.64929200  | -1.78025700 |
| H  | -4.46033200 | -1.10459700 | -1.77319100 |
| H  | -6.67033100 | -0.32375000 | -0.89929100 |
| H  | -5.78481100 | -1.16124000 | 0.38123400  |
| H  | -5.86615400 | 0.60525900  | 0.37172900  |
| C  | -0.31270500 | 1.45308600  | 0.84622300  |
| C  | -0.25361300 | 2.80721500  | 0.12412400  |
| H  | 0.57902600  | 1.27860100  | 1.48413800  |
| H  | -1.19120000 | 1.39300200  | 1.50135500  |
| C  | -0.21109200 | 3.96926800  | 1.12783100  |
| H  | 0.64445900  | 2.85003100  | -0.50463700 |
| H  | -1.11456900 | 2.93921400  | -0.54745500 |
| C  | -0.11826100 | 5.33873400  | 0.45015600  |
| H  | -1.10755900 | 3.93051400  | 1.76100200  |
| H  | 0.64423500  | 3.82310000  | 1.79766100  |
| H  | -0.09376300 | 6.14364400  | 1.19103100  |
| H  | 0.79021600  | 5.42040300  | -0.15682600 |
| H  | -0.97582700 | 5.51955100  | -0.20851000 |
| Cl | 2.37519700  | 0.12469200  | 2.38753000  |

$C_{444,1}P^+Cl^-$ :

|   |             |             |             |
|---|-------------|-------------|-------------|
| P | -0.03150300 | -0.19213800 | 0.45888300  |
| C | -1.53042200 | -0.40313200 | -0.56205600 |
| C | -2.86498600 | -0.16730100 | 0.16200800  |
| H | -1.44794300 | -1.45060800 | -0.89897600 |
| H | -1.42520800 | 0.25983100  | -1.42991600 |
| C | -4.05794700 | -0.35569900 | -0.78700300 |
| H | -2.95786300 | -0.88098600 | 0.98897100  |
| H | -2.90829400 | 0.83968700  | 0.60111200  |
| C | -5.40666300 | -0.16194300 | -0.08889200 |
| H | -3.96967000 | 0.34972700  | -1.62425700 |
| H | -4.00494200 | -1.36068900 | -1.22200800 |
| H | -6.23678100 | -0.30733300 | -0.78682400 |
| H | -5.53357500 | -0.87760600 | 0.73069900  |
| H | -5.49882800 | 0.84611700  | 0.33193900  |
| C | 0.13556400  | 1.56693200  | 0.97721400  |
| C | 0.29349800  | 2.58468700  | -0.16416500 |
| H | 0.99442900  | 1.61723800  | 1.65753200  |
| H | -0.74922000 | 1.80342100  | 1.58081600  |
| C | 0.41667600  | 4.02565400  | 0.35201400  |
| H | 1.18021000  | 2.33921300  | -0.76194800 |

|    |             |             |             |
|----|-------------|-------------|-------------|
| H  | -0.56549700 | 2.51871700  | -0.84380700 |
| C  | 0.57871300  | 5.04892700  | -0.77540700 |
| H  | -0.47111000 | 4.27169200  | 0.94943400  |
| H  | 1.27306800  | 4.09158800  | 1.03605700  |
| H  | 0.66505400  | 6.06434200  | -0.37740100 |
| H  | 1.47695300  | 4.84677200  | -1.36906000 |
| H  | -0.27978600 | 5.03034700  | -1.45575900 |
| C  | 1.41229200  | -0.69599600 | -0.53679600 |
| C  | 2.77639100  | -0.58574600 | 0.16092100  |
| H  | 1.38943100  | -0.10138800 | -1.45853200 |
| H  | 1.17079300  | -1.74232900 | -0.79382700 |
| C  | 3.91529900  | -1.05178400 | -0.75826200 |
| H  | 2.97293300  | 0.44636600  | 0.48424200  |
| H  | 2.77635400  | -1.20611200 | 1.06551500  |
| C  | 5.28999700  | -0.97077100 | -0.08943500 |
| H  | 3.71411100  | -2.08227600 | -1.07388700 |
| H  | 3.91302500  | -0.44309800 | -1.67253300 |
| H  | 6.07892000  | -1.30843800 | -0.76834300 |
| H  | 5.52864600  | 0.05562800  | 0.21275900  |
| H  | 5.33248900  | -1.59976300 | 0.80651100  |
| C  | -0.14204800 | -1.19003000 | 1.97142200  |
| H  | -0.25870500 | -2.23097400 | 1.63020600  |
| H  | 0.76986100  | -1.07352500 | 2.56239900  |
| H  | -1.00128500 | -0.87200900 | 2.56699100  |
| Cl | -0.37371900 | -3.57789800 | -0.39533700 |

$C_{444,3}P^+Cl^-$ :

|   |             |             |             |
|---|-------------|-------------|-------------|
| P | 0.00067000  | 0.08548700  | 0.29874800  |
| C | -1.46559600 | -0.13682100 | -0.76203800 |
| C | -2.82766200 | -0.02242100 | -0.06056600 |
| H | -1.30156800 | -1.12885600 | -1.22755500 |
| H | -1.37743700 | 0.60157700  | -1.56898700 |
| C | -3.98331800 | -0.26626700 | -1.04304300 |
| H | -2.89261800 | -0.75687100 | 0.75209300  |
| H | -2.95118100 | 0.96709200  | 0.40235300  |
| C | -5.35880400 | -0.17188100 | -0.37770200 |
| H | -3.91782700 | 0.46195600  | -1.86220900 |
| H | -3.85475900 | -1.25392700 | -1.50100200 |
| H | -6.15970600 | -0.35254500 | -1.10100100 |
| H | -5.46387200 | -0.91161200 | 0.42382600  |
| H | -5.52450200 | 0.81900900  | 0.06103100  |
| C | 0.00567500  | 1.77965400  | 1.02583100  |
| C | 0.08559200  | 2.93452000  | 0.01419500  |
| H | 0.85036900  | 1.82447300  | 1.72419500  |



|    |             |             |             |
|----|-------------|-------------|-------------|
| H  | -0.90377900 | 1.86681300  | 1.63253600  |
| C  | 0.05984500  | 4.30988500  | 0.69680200  |
| H  | 1.00296700  | 2.84525500  | -0.58043700 |
| H  | -0.74993100 | 2.86898200  | -0.69400900 |
| C  | 0.14265200  | 5.46859000  | -0.30081000 |
| H  | -0.85848200 | 4.40058900  | 1.29190100  |
| H  | 0.89324900  | 4.37502200  | 1.40875500  |
| H  | 0.12050000  | 6.43421500  | 0.21302200  |
| H  | 1.06780100  | 5.42413300  | -0.88582600 |
| H  | -0.69631600 | 5.44702000  | -1.00492900 |
| C  | 1.48877500  | -0.15449700 | -0.72608000 |
| C  | 2.82893600  | -0.18972000 | 0.02357700  |
| H  | 1.47682100  | 0.64852000  | -1.47403000 |
| H  | 1.28859400  | -1.10611200 | -1.26182300 |
| C  | 4.00513800  | -0.34173600 | -0.95313200 |
| H  | 2.97625200  | 0.71625300  | 0.62981600  |
| H  | 2.83871200  | -1.03890900 | 0.71777500  |
| C  | 5.35934100  | -0.42514000 | -0.24412200 |
| H  | 3.84315300  | -1.24068600 | -1.55909100 |
| H  | 4.00493600  | 0.50546400  | -1.65189600 |
| H  | 6.17566100  | -0.53173400 | -0.96497200 |
| H  | 5.55678500  | 0.47423500  | 0.35097400  |
| H  | 5.40025300  | -1.28655300 | 0.43166800  |
| C  | -0.02481600 | -1.03635500 | 1.75472500  |
| H  | 0.96852600  | -0.94254000 | 2.21191800  |
| H  | -0.73073200 | -0.59212200 | 2.46853600  |
| C  | -0.36384900 | -2.51698200 | 1.50085400  |
| H  | 0.21817500  | -2.90744400 | 0.65927300  |
| H  | -1.40630900 | -2.59660600 | 1.17540800  |
| C  | -0.15051600 | -3.35394400 | 2.76540500  |
| H  | -0.41609600 | -4.39807900 | 2.57773100  |
| H  | 0.89742600  | -3.33264300 | 3.08650500  |
| H  | -0.76242100 | -2.99793700 | 3.60334600  |
| Cl | 0.09229100  | -2.93229700 | -1.93232300 |

C<sub>444,14</sub>P<sup>+</sup>Cl<sup>-</sup>:

|   |             |             |             |
|---|-------------|-------------|-------------|
| P | -3.93806600 | 0.03611200  | 0.15858900  |
| C | -4.10372700 | -1.40857500 | -0.94086800 |
| C | -4.04478500 | -2.78377100 | -0.25806300 |
| H | -3.31372500 | -1.31304700 | -1.69657300 |
| H | -5.06044800 | -1.22722100 | -1.46829300 |
| C | -4.22890700 | -3.92079300 | -1.27454600 |
| H | -3.08879000 | -2.92173100 | 0.26711600  |
| H | -4.83155400 | -2.85709700 | 0.50316300  |

|   |             |             |             |
|---|-------------|-------------|-------------|
| C | -4.19137700 | -5.30797200 | -0.62798900 |
| H | -5.18136700 | -3.77639800 | -1.79774900 |
| H | -3.44501000 | -3.84822800 | -2.03995400 |
| H | -4.32314300 | -6.09532100 | -1.37631600 |
| H | -3.23619100 | -5.48790100 | -0.12098900 |
| H | -4.98829400 | -5.42152500 | 0.11541700  |
| C | -5.17408900 | 0.00961900  | 1.52011300  |
| C | -6.62175200 | -0.35520200 | 1.14250400  |
| H | -5.13332400 | 1.00981700  | 1.96973000  |
| H | -4.78010100 | -0.68023500 | 2.27741000  |
| C | -7.58957700 | -0.08676100 | 2.30219100  |
| H | -6.93249900 | 0.18235100  | 0.23831800  |
| H | -6.66449400 | -1.41602200 | 0.86815000  |
| C | -9.02739200 | -0.48871200 | 1.95990700  |
| H | -7.25877200 | -0.62333400 | 3.20350100  |
| H | -7.55964700 | 0.98214200  | 2.55602800  |
| H | -9.70993500 | -0.26153100 | 2.78515700  |
| H | -9.37924300 | 0.04078400  | 1.06924900  |
| H | -9.09852700 | -1.56204500 | 1.75276000  |
| C | -2.30603700 | 0.00145400  | 1.01429700  |
| C | -1.07251800 | 0.03146200  | 0.09708100  |
| H | -2.29416100 | -0.90000300 | 1.63883500  |
| H | -2.29132600 | 0.85542600  | 1.70268100  |
| C | 0.24195200  | 0.00610200  | 0.89054200  |
| H | -1.09765800 | -0.82584700 | -0.58701900 |
| H | -1.09678500 | 0.93006000  | -0.53138700 |
| C | 1.48653400  | 0.02096700  | -0.00543700 |
| H | 0.27045800  | 0.86844400  | 1.57105900  |
| H | 0.26263400  | -0.88753600 | 1.52975700  |
| H | 1.45634500  | -0.84445000 | -0.68221300 |
| H | 1.45955900  | 0.91083900  | -0.64984200 |
| C | -4.07559900 | 1.54186600  | -0.85889400 |
| C | -4.12866000 | 2.87427600  | -0.09683300 |
| H | -4.99305100 | 1.37092700  | -1.46060900 |
| H | -3.22539700 | 1.51918500  | -1.55265800 |
| C | -4.19629300 | 4.06361600  | -1.06689600 |
| H | -5.01756700 | 2.89519600  | 0.54555100  |
| H | -3.25811900 | 2.99505300  | 0.56459900  |
| C | -4.29204500 | 5.41227900  | -0.34899400 |
| H | -3.30899000 | 4.05144800  | -1.71391400 |
| H | -5.06046500 | 3.92837900  | -1.72761500 |
| H | -4.33722600 | 6.23764400  | -1.06602100 |
| H | -5.19120500 | 5.46647300  | 0.27467700  |
| H | -3.42568900 | 5.58365400  | 0.30065500  |

|    |             |             |             |
|----|-------------|-------------|-------------|
| C  | 2.80301100  | 0.00411300  | 0.78128900  |
| H  | 2.82626400  | -0.88236200 | 1.43090300  |
| H  | 2.83465200  | 0.87302600  | 1.45383200  |
| C  | 4.04849700  | 0.00950400  | -0.11350800 |
| H  | 4.01718500  | -0.86138800 | -0.78352100 |
| H  | 4.02254400  | 0.89365900  | -0.76614400 |
| C  | 5.36619800  | -0.00224600 | 0.67106100  |
| H  | 5.39029700  | -0.88450600 | 1.32653500  |
| H  | 5.39855100  | 0.87068300  | 1.33854600  |
| C  | 6.61158700  | -0.00215900 | -0.22385100 |
| H  | 6.57956700  | -0.87626900 | -0.88977700 |
| H  | 6.58593700  | 0.87872200  | -0.88106200 |
| C  | 7.93005900  | -0.01080600 | 0.55946300  |
| H  | 7.95486600  | -0.89068600 | 1.21815800  |
| H  | 7.96273200  | 0.86441800  | 1.22398700  |
| C  | 9.17510100  | -0.01349700 | -0.33591800 |
| H  | 9.14260800  | -0.88939100 | -0.99953100 |
| H  | 9.14931400  | 0.86557000  | -0.99560700 |
| C  | 10.49416200 | -0.02027500 | 0.44641500  |
| H  | 10.51959500 | -0.89891100 | 1.10681000  |
| H  | 10.52696900 | 0.85619000  | 1.10936600  |
| C  | 11.73889400 | -0.02423600 | -0.44910800 |
| H  | 11.70721400 | -0.90102600 | -1.11183300 |
| H  | 11.71400600 | 0.85400400  | -1.11018900 |
| C  | 13.05864800 | -0.03010700 | 0.33215300  |
| H  | 13.08360700 | -0.90772900 | 0.99245300  |
| H  | 13.09068800 | 0.84640400  | 0.99362000  |
| C  | 14.29596800 | -0.03448900 | -0.57043900 |
| H  | 15.22059600 | -0.03857500 | 0.01584300  |
| H  | 14.30990500 | -0.91770200 | -1.21920200 |
| H  | 14.31696900 | 0.84941500  | -1.21806000 |
| Cl | -6.78450100 | 0.23308800  | -2.30298000 |

**Bmin<sup>+</sup>Cl<sup>-</sup>:**

|   |            |             |             |
|---|------------|-------------|-------------|
| C | 1.37156100 | 0.22941500  | -0.10097800 |
| C | 2.49970000 | -1.68129700 | 0.07305700  |
| C | 1.25422500 | -1.96735900 | -0.39917600 |
| N | 0.57335500 | -0.76752500 | -0.50346500 |
| H | 1.01515100 | 1.29868900  | -0.07052300 |
| H | 3.33931300 | -2.32274300 | 0.28767800  |
| H | 0.80426400 | -2.90849500 | -0.67155300 |
| N | 2.54991600 | -0.30689500 | 0.25357700  |
| C | 3.69116200 | 0.46418900  | 0.74355900  |
| H | 3.97816300 | 0.11404000  | 1.73756000  |

|    |             |             |             |
|----|-------------|-------------|-------------|
| H  | 4.53633600  | 0.36002000  | 0.05928100  |
| H  | 3.39687400  | 1.51192200  | 0.79998500  |
| C  | -0.83159200 | -0.56760000 | -0.92381200 |
| C  | -1.81136000 | -0.73952300 | 0.23801800  |
| H  | -1.02639400 | -1.27701100 | -1.73408000 |
| H  | -0.89057600 | 0.45917900  | -1.29814600 |
| C  | -3.25512300 | -0.48521800 | -0.21251900 |
| H  | -1.71829500 | -1.74588200 | 0.67018600  |
| H  | -1.54235800 | -0.01239300 | 1.01224300  |
| C  | -4.26458900 | -0.65196800 | 0.92662700  |
| H  | -3.31789500 | 0.53274300  | -0.61452500 |
| H  | -3.51276500 | -1.16752000 | -1.03487900 |
| H  | -5.28479800 | -0.45842800 | 0.58119600  |
| H  | -4.23923500 | -1.66763100 | 1.33850700  |
| H  | -4.05235700 | 0.04556400  | 1.74361500  |
| Cl | -0.31013100 | 2.77382600  | -0.18388100 |

Na<sup>+</sup>Cl<sup>-</sup>:

|    |            |            |             |
|----|------------|------------|-------------|
| Cl | 0.00000000 | 0.00000000 | 0.93346400  |
| Na | 0.00000000 | 0.00000000 | -1.44262600 |

---

Following are the cartesian coordinates of the optimized intermediates, transition states and products.

**1:**

|    |          |          |          |
|----|----------|----------|----------|
| C  | 0.6549   | 0.90342  | -0.37921 |
| H  | 1.20114  | 1.81991  | -0.14365 |
| H  | 0.49947  | 0.84017  | -1.4565  |
| C  | -0.65488 | 0.90343  | 0.37921  |
| H  | -0.49946 | 0.84018  | 1.4565   |
| H  | -1.20114 | 1.8199   | 0.14362  |
| Cl | -1.73996 | -0.47533 | -0.0808  |
| Cl | 1.73995  | -0.47533 | 0.0808   |

**TS<sub>1-2</sub>:**

|    |          |          |          |
|----|----------|----------|----------|
| C  | 0.12222  | 1.3271   | -0.33025 |
| H  | 0.77487  | 2.0915   | 0.07978  |
| H  | 0.12301  | 1.17542  | -1.40499 |
| C  | -0.6625  | 0.55812  | 0.53488  |
| H  | 0.38906  | -0.11149 | 0.60912  |
| H  | -0.87143 | 0.92167  | 1.53976  |
| Cl | -1.93973 | -0.47595 | -0.11493 |
| Cl | 2.10598  | -0.42925 | -0.00575 |

**2:**

|    |          |          |          |
|----|----------|----------|----------|
| C  | -0.5592  | 1.57752  | -0.28802 |
| H  | -0.08218 | 2.44515  | 0.15786  |
| H  | -0.59844 | 1.51336  | -1.37025 |
| C  | -1.10726 | 0.65854  | 0.50431  |
| H  | 1.36473  | 0.21846  | 0.02796  |
| H  | -1.10189 | 0.70728  | 1.58796  |
| Cl | -1.9346  | -0.75957 | -0.10004 |
| Cl | 2.54733  | -0.31694 | -0.00004 |

**3:**

|    |             |             |             |
|----|-------------|-------------|-------------|
| C  | -0.59326600 | 0.86529900  | -0.06867300 |
| H  | -0.04851700 | 1.70185200  | 0.37443400  |
| H  | -0.52620600 | 0.91235600  | -1.15557900 |
| C  | -2.02579200 | 0.88996500  | 0.41562800  |
| H  | -2.09451000 | 0.71865900  | 1.49021000  |
| H  | -2.45803500 | 1.86419800  | 0.17462000  |
| Cl | -3.06635500 | -0.35449400 | -0.39094000 |
| Cl | 0.28746800  | -0.64707000 | 0.44183700  |
| Cl | 3.85156700  | 0.08728800  | -0.22609500 |
| H  | 2.60604500  | -0.18595000 | 0.01295500  |

**TS<sub>3-4</sub>:**

|    |             |             |             |
|----|-------------|-------------|-------------|
| C  | 0.41787600  | -1.43778500 | 0.78125300  |
| H  | -0.15081800 | -1.70252500 | 1.66750300  |
| H  | 0.53439600  | -2.19179000 | 0.01100700  |
| C  | 1.11070700  | -0.22046400 | 0.75836400  |
| H  | 0.25918000  | 0.64362300  | 0.53924800  |
| H  | 1.45124100  | 0.14482600  | 1.73294800  |
| C1 | 2.34826300  | 0.00784400  | -0.50256000 |
| C1 | -1.93713500 | -1.10754900 | -0.36432800 |
| C1 | -0.97569400 | 1.85101700  | 0.10417500  |
| H  | -1.66787300 | 0.28304900  | -0.22229500 |

**4:**

|    |             |             |             |
|----|-------------|-------------|-------------|
| C  | 1.28017100  | -1.48616700 | 0.29287100  |
| H  | 0.66756500  | -1.95465400 | 1.05748700  |
| H  | 1.09037800  | -1.73990900 | -0.74489300 |
| C  | 2.26615000  | -0.66888900 | 0.66169900  |
| H  | 0.10059200  | 0.49294900  | 0.32713300  |
| H  | 2.49471800  | -0.42039000 | 1.69286900  |
| C1 | 3.34602900  | 0.10550900  | -0.47288400 |
| C1 | -3.89697100 | -0.58077400 | -0.21481000 |
| C1 | -0.78982300 | 1.44000300  | 0.21757300  |
| H  | -2.83817100 | 0.15180900  | -0.06796100 |

**5:**

|    |             |             |             |
|----|-------------|-------------|-------------|
| C1 | -3.25741400 | -0.48576500 | -0.07949200 |
| C  | 0.09161000  | 0.34180100  | 0.64761000  |
| H  | 0.44971500  | 0.38150300  | 1.67672000  |
| H  | -1.00532500 | 0.33635600  | 0.60484800  |
| C  | 0.57030000  | -0.89451300 | -0.07242400 |
| H  | 0.15962300  | -1.77366500 | 0.42747500  |
| H  | 0.25717900  | -0.89585900 | -1.11572000 |
| C1 | 2.38384600  | -1.08830700 | -0.06926500 |
| C1 | 0.64811800  | 1.88395000  | -0.14797500 |

**TS<sub>5-6</sub>:**

|    |             |             |             |
|----|-------------|-------------|-------------|
| C1 | -0.68884600 | 2.24799100  | 0.01388800  |
| C  | 0.59540800  | -1.23310800 | 0.82435200  |
| H  | 0.86284300  | -2.06535800 | 0.19055800  |
| H  | 1.17367300  | -1.10481700 | 1.73010300  |
| C  | -0.63869500 | -0.60487000 | 0.73578400  |
| H  | -1.14372500 | -0.33621400 | 1.66122100  |
| H  | -0.50553400 | 0.75457000  | 0.33379700  |
| C1 | -1.81393200 | -1.26217700 | -0.45905400 |

---

|    |            |             |             |
|----|------------|-------------|-------------|
| C1 | 2.49527600 | -0.17524400 | -0.33580400 |
|----|------------|-------------|-------------|

**6:**

|    |             |             |             |
|----|-------------|-------------|-------------|
| C1 | 1.57898100  | 1.72898800  | 0.00032600  |
| C  | -1.01937700 | -1.24956600 | 0.00211300  |
| H  | -1.52897000 | -2.20744700 | 0.00244900  |
| H  | 0.06783400  | -1.22439900 | 0.00197300  |
| C  | -1.66265900 | -0.09071000 | 0.00085100  |
| H  | -1.16584100 | 0.87274100  | 0.00098000  |
| H  | 2.20703100  | 0.28541500  | -0.00056100 |
| C1 | -3.42643400 | 0.03850500  | -0.00092300 |
| C1 | 2.81875700  | -1.16070900 | -0.00073300 |

**7:**

|   |            |             |             |
|---|------------|-------------|-------------|
| P | 1.45834500 | 0.21974700  | 0.48042700  |
| C | 1.05157200 | 0.63322800  | -1.24900400 |
| C | 2.21809800 | 1.14920300  | -2.10742200 |
| H | 0.24313600 | 1.37327500  | -1.19913100 |
| H | 0.60295900 | -0.28511500 | -1.66303500 |
| C | 1.75042700 | 1.51266300  | -3.52493300 |
| H | 2.68496600 | 2.02979900  | -1.64581100 |
| H | 3.00027100 | 0.38303700  | -2.17738100 |
| C | 2.89102800 | 2.00998100  | -4.41658600 |
| H | 1.27696800 | 0.63354100  | -3.97898700 |
| H | 0.97037500 | 2.28232100  | -3.45928500 |
| H | 2.52704200 | 2.26030100  | -5.41769900 |
| H | 3.36068500 | 2.90778500  | -3.99917900 |
| H | 3.67053800 | 1.24796800  | -4.52720900 |
| C | 2.82031700 | -1.00589700 | 0.55937600  |
| C | 2.44707200 | -2.44620800 | 0.16127000  |
| H | 3.21852100 | -0.97266300 | 1.58081200  |
| H | 3.61369300 | -0.61575900 | -0.08997100 |
| C | 3.69312300 | -3.33287800 | 0.03349500  |
| H | 1.77605800 | -2.86808900 | 0.91888600  |
| H | 1.87092600 | -2.45689600 | -0.77089900 |
| C | 3.34637300 | -4.78791700 | -0.29367100 |
| H | 4.34675800 | -2.92576900 | -0.74982100 |
| H | 4.27268900 | -3.29212800 | 0.96603000  |
| H | 4.25065300 | -5.39591400 | -0.39631700 |
| H | 2.73115400 | -5.23471600 | 0.49507700  |
| H | 2.78352200 | -4.85784700 | -1.23029600 |
| C | 2.06279500 | 1.71178900  | 1.36614800  |
| C | 1.09831100 | 2.91035500  | 1.37152900  |
| H | 3.01779300 | 1.98820000  | 0.90277700  |

---

|    |              |              |              |
|----|--------------|--------------|--------------|
| H  | 2. 29641000  | 1. 40008500  | 2. 39132400  |
| C  | 1. 67373900  | 4. 10788600  | 2. 14190500  |
| H  | 0. 87791300  | 3. 21722400  | 0. 34183700  |
| H  | 0. 14045900  | 2. 61960200  | 1. 82041400  |
| C  | 0. 72912300  | 5. 31292400  | 2. 14870100  |
| H  | 1. 89135400  | 3. 80255300  | 3. 17365900  |
| H  | 2. 63547300  | 4. 39374200  | 1. 69650900  |
| H  | 1. 16364900  | 6. 14941700  | 2. 70407200  |
| H  | 0. 52147100  | 5. 66057200  | 1. 13078900  |
| H  | -0. 22924400 | 5. 06389500  | 2. 61737600  |
| C  | -0. 05203300 | -0. 43119100 | 1. 26994500  |
| C  | 0. 09585500  | -0. 86033900 | 2. 73908400  |
| H  | -0. 37007000 | -1. 26023200 | 0. 61816700  |
| H  | -0. 81584900 | 0. 34854100  | 1. 16229500  |
| C  | -1. 22315000 | -1. 41462600 | 3. 29825500  |
| H  | 0. 87436100  | -1. 62809400 | 2. 83267400  |
| H  | 0. 42008000  | -0. 01257800 | 3. 35694000  |
| C  | -1. 10988600 | -1. 85714300 | 4. 75943100  |
| H  | -2. 00325900 | -0. 64799400 | 3. 20423600  |
| H  | -1. 54569300 | -2. 26021900 | 2. 67785300  |
| H  | -2. 06344700 | -2. 24863100 | 5. 12646100  |
| H  | -0. 35859100 | -2. 64567000 | 4. 87886000  |
| H  | -0. 82147500 | -1. 02191500 | 5. 40735400  |
| C1 | -0. 76521900 | -2. 33738200 | -1. 72889600 |
| C  | -3. 25278300 | 0. 07215200  | -1. 78695800 |
| H  | -3. 81824600 | 0. 41538900  | -2. 65321900 |
| H  | -2. 29480200 | -0. 37117300 | -2. 07754700 |
| C  | -3. 99512500 | -0. 97273300 | -0. 99303100 |
| H  | -4. 07676500 | -1. 87376600 | -1. 60306800 |
| H  | -3. 47485900 | -1. 22311100 | -0. 07041500 |
| C1 | -5. 69021600 | -0. 48042000 | -0. 54372200 |
| C1 | -2. 86879300 | 1. 56823300  | -0. 80777700 |

**TS<sub>7-8</sub>:**

|   |              |              |              |
|---|--------------|--------------|--------------|
| P | -1. 24631500 | 0. 10121200  | 0. 71194300  |
| C | -1. 45959600 | 0. 10990800  | -1. 09866900 |
| C | -2. 91510400 | 0. 14473400  | -1. 59312800 |
| H | -0. 91666400 | -0. 77181200 | -1. 46601900 |
| H | -0. 88171300 | 0. 96503000  | -1. 46849200 |
| C | -2. 98354100 | 0. 15670500  | -3. 12759800 |
| H | -3. 46660300 | -0. 72738100 | -1. 21863600 |
| H | -3. 43600600 | 1. 03024500  | -1. 20532700 |
| C | -4. 41963700 | 0. 18315400  | -3. 65778200 |
| H | -2. 43269800 | 1. 02820900  | -3. 50341200 |



---

|    |             |             |             |
|----|-------------|-------------|-------------|
| H  | -2.45936400 | -0.72589800 | -3.51461800 |
| H  | -4.43543100 | 0.19194400  | -4.75194300 |
| H  | -4.98334900 | -0.69537200 | -3.32424000 |
| H  | -4.95614400 | 1.07325600  | -3.31028000 |
| C  | -1.97320100 | 1.61888900  | 1.44661200  |
| C  | -1.38738200 | 2.94319500  | 0.92522900  |
| H  | -1.84117900 | 1.53860700  | 2.53222300  |
| H  | -3.05338300 | 1.57562200  | 1.26259800  |
| C  | -2.02434700 | 4.15968700  | 1.61223700  |
| H  | -0.30248600 | 2.96273400  | 1.08185200  |
| H  | -1.53905400 | 3.01733000  | -0.15815100 |
| C  | -1.46142100 | 5.48776500  | 1.09846600  |
| H  | -3.11113700 | 4.13433300  | 1.45790900  |
| H  | -1.86673100 | 4.08625300  | 2.69635300  |
| H  | -1.93163200 | 6.33639700  | 1.60446600  |
| H  | -0.38141200 | 5.55349600  | 1.26941000  |
| H  | -1.63475300 | 5.60243400  | 0.02289900  |
| C  | -2.15315100 | -1.31057300 | 1.45443600  |
| C  | -1.68780600 | -2.70389900 | 0.99508400  |
| H  | -3.21460000 | -1.16049100 | 1.22195800  |
| H  | -2.05917500 | -1.20939000 | 2.54256700  |
| C  | -2.49841000 | -3.82182900 | 1.66612400  |
| H  | -1.77335800 | -2.78897700 | -0.09413600 |
| H  | -0.62324000 | -2.83669400 | 1.21769200  |
| C  | -2.05242400 | -5.21877700 | 1.22533700  |
| H  | -2.40605800 | -3.73207900 | 2.75674400  |
| H  | -3.56368600 | -3.68535000 | 1.43710700  |
| H  | -2.64425300 | -5.99537200 | 1.71951000  |
| H  | -2.16672500 | -5.34809900 | 0.14369300  |
| H  | -0.99921700 | -5.39388200 | 1.46991200  |
| C  | 0.53126100  | -0.00701800 | 1.10561500  |
| C  | 0.87309200  | -0.08646600 | 2.60260800  |
| H  | 1.00136500  | 0.85918800  | 0.62588500  |
| H  | 0.90248800  | -0.87837300 | 0.54872200  |
| C  | 2.38882600  | -0.20052900 | 2.82674100  |
| H  | 0.49933700  | 0.79987100  | 3.13240800  |
| H  | 0.37831700  | -0.95259000 | 3.06117700  |
| C  | 2.76350800  | -0.27797600 | 4.30903900  |
| H  | 2.76182400  | -1.08761800 | 2.30036500  |
| H  | 2.88697100  | 0.65814600  | 2.36000000  |
| H  | 3.84734200  | -0.35831300 | 4.43725600  |
| H  | 2.42978500  | 0.61386100  | 4.85149500  |
| H  | 2.30631100  | -1.14966300 | 4.79078300  |
| C1 | 1.64948600  | 1.89170200  | -1.85607400 |

---

|    |             |              |              |
|----|-------------|--------------|--------------|
| C  | 3. 50371300 | -1. 39258800 | -2. 34487300 |
| H  | 3. 75868600 | -2. 17116500 | -1. 64194700 |
| H  | 3. 20739000 | -1. 70308800 | -3. 33849000 |
| C  | 3. 83244500 | -0. 06527600 | -2. 13404300 |
| H  | 4. 16692200 | 0. 52344200  | -2. 98654600 |
| H  | 2. 66886300 | 0. 73677600  | -1. 98620800 |
| Cl | 4. 77763200 | 0. 33630700  | -0. 66153500 |
| Cl | 1. 20218900 | -2. 21320800 | -1. 66617400 |

**8:**

|   |             |              |              |
|---|-------------|--------------|--------------|
| P | 2. 09286600 | 0. 10313500  | 0. 39098000  |
| C | 1. 42092800 | 1. 08903400  | -0. 99333900 |
| C | 2. 24723300 | 2. 32823000  | -1. 37779200 |
| H | 0. 39731000 | 1. 36041600  | -0. 70504100 |
| H | 1. 32531100 | 0. 39951800  | -1. 84170800 |
| C | 1. 62319600 | 3. 07274200  | -2. 56754400 |
| H | 2. 31549700 | 3. 01222200  | -0. 51906300 |
| H | 3. 27643500 | 2. 03490700  | -1. 63400200 |
| C | 2. 41723200 | 4. 32027200  | -2. 96507200 |
| H | 1. 55415900 | 2. 38919200  | -3. 42450900 |
| H | 0. 59231700 | 3. 35459700  | -2. 31493000 |
| H | 1. 95134300 | 4. 82994100  | -3. 81477600 |
| H | 2. 47255500 | 5. 03579400  | -2. 13652200 |
| H | 3. 44367600 | 4. 06356700  | -3. 25204600 |
| C | 3. 73346400 | -0. 58784300 | -0. 04387700 |
| C | 3. 75119500 | -1. 52684500 | -1. 26222300 |
| H | 4. 09597300 | -1. 10731400 | 0. 85263300  |
| H | 4. 39985300 | 0. 26976600  | -0. 20277200 |
| C | 5. 16277200 | -2. 06483900 | -1. 53876800 |
| H | 3. 06763100 | -2. 37203800 | -1. 09432700 |
| H | 3. 38409600 | -0. 99403500 | -2. 15178500 |
| C | 5. 20792800 | -3. 00798300 | -2. 74445100 |
| H | 5. 84558300 | -1. 22019500 | -1. 70345300 |
| H | 5. 53028600 | -2. 58909800 | -0. 64598400 |
| H | 6. 22356600 | -3. 37830600 | -2. 91810700 |
| H | 4. 55691600 | -3. 87640800 | -2. 59202300 |
| H | 4. 87649800 | -2. 50045900 | -3. 65757200 |
| C | 2. 33970500 | 1. 15351200  | 1. 87046700  |
| C | 1. 06961000 | 1. 82650900  | 2. 41931900  |
| H | 3. 09029200 | 1. 90465200  | 1. 59280400  |
| H | 2. 80186000 | 0. 51166700  | 2. 63145600  |
| C | 1. 37952300 | 2. 69752600  | 3. 64554300  |
| H | 0. 60592100 | 2. 44745200  | 1. 63897600  |
| H | 0. 32834400 | 1. 06158800  | 2. 69261100  |

---

|    |             |             |             |
|----|-------------|-------------|-------------|
| C  | 0.13121400  | 3.38011500  | 4.21209200  |
| H  | 1.84597400  | 2.07587300  | 4.42219300  |
| H  | 2.12390100  | 3.45721800  | 3.37028400  |
| H  | 0.37751200  | 3.99196000  | 5.08611800  |
| H  | -0.33533300 | 4.03398000  | 3.46651100  |
| H  | -0.61772000 | 2.64174300  | 4.52030700  |
| C  | 0.90588800  | -1.23881300 | 0.75049800  |
| C  | 1.25881900  | -2.11980900 | 1.96107700  |
| H  | 0.83187400  | -1.83783800 | -0.16588100 |
| H  | -0.06972400 | -0.75299000 | 0.87678800  |
| C  | 0.21364200  | -3.22453200 | 2.17499000  |
| H  | 2.24897700  | -2.57884300 | 1.82101900  |
| H  | 1.32033000  | -1.50114100 | 2.86848800  |
| C  | 0.52866000  | -4.10912400 | 3.38460500  |
| H  | -0.77538500 | -2.76399800 | 2.30035200  |
| H  | 0.15243900  | -3.84358100 | 1.26976700  |
| H  | -0.23212900 | -4.88579700 | 3.51417500  |
| H  | 1.49827300  | -4.60776900 | 3.27062600  |
| H  | 0.56426700  | -3.52001800 | 4.30836300  |
| C1 | -1.58189400 | -1.20204200 | -2.47327400 |
| C  | -5.85501200 | -0.45403800 | -0.92117300 |
| H  | -5.96854900 | -1.23121200 | -1.67152300 |
| H  | -4.85304700 | -0.09565000 | -0.69516700 |
| C  | -6.88728400 | 0.06911000  | -0.27427000 |
| H  | -6.82532800 | 0.84855600  | 0.48460800  |
| H  | -1.89808200 | -0.31070500 | -1.38337500 |
| C1 | -8.55521700 | -0.44023500 | -0.56190400 |
| C1 | -2.26341500 | 0.76441800  | -0.06533300 |
